# Supplementary material for: Nanodelivery of parthenolide using functionalized nanographene enhances its anticancer activity
Source: Royal Society of Chemistry journal article supplement (doi:10.1039/c4ra10871j), 2014-11-11
Supplement: c4ra10871j1.pdf [file c4ra10871j1.pdf]

## Supporting Information

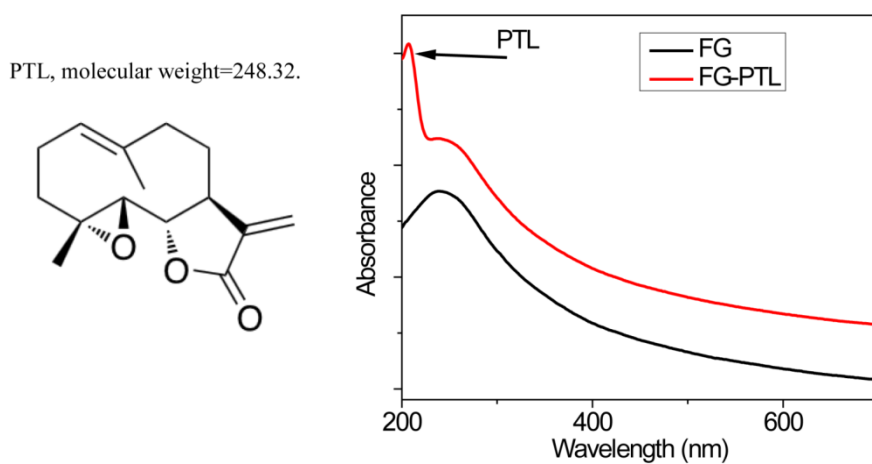

Figure 1. UV-Vis absorption spectra of fGn and PTL-fGn. The structure of PTL is shown on the left.

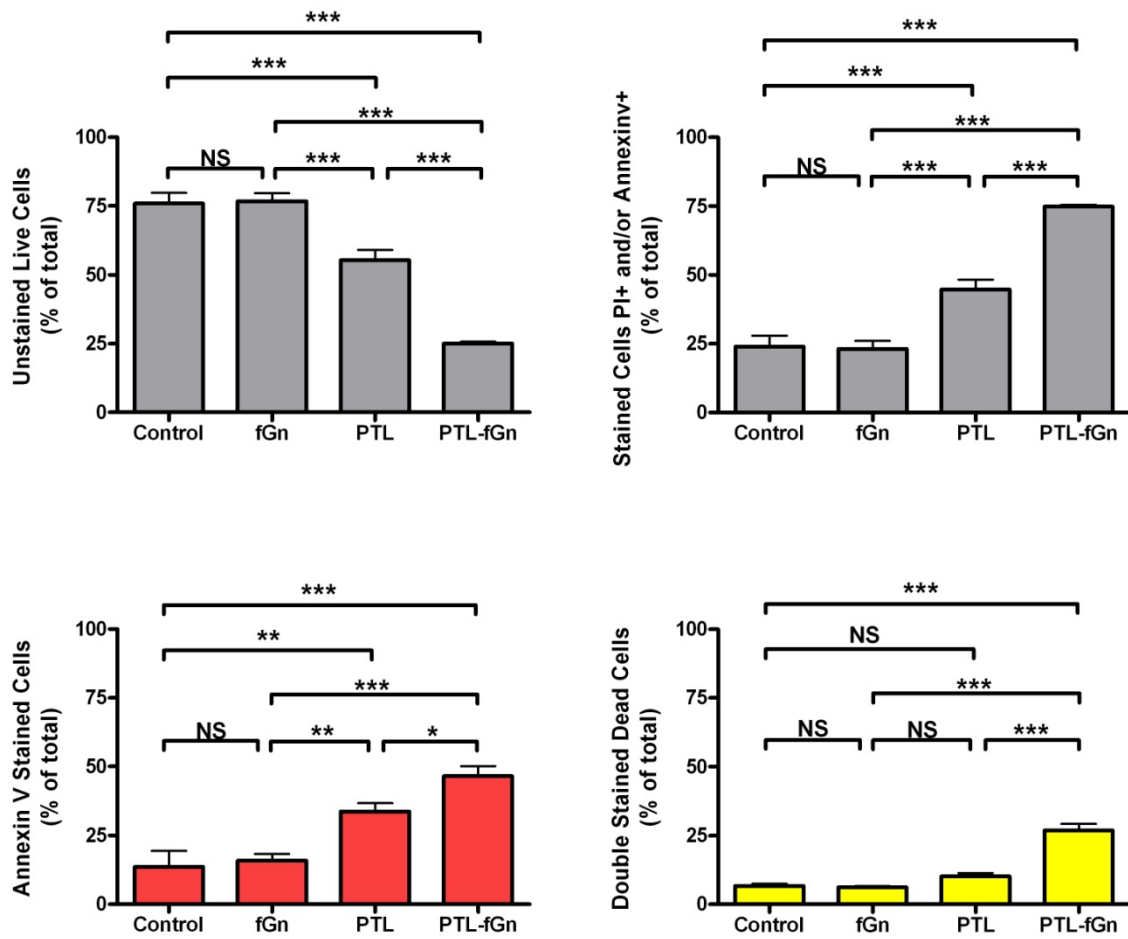

Figure 2. Full graphical representation of the statistical analysis of flow cytometry data.

\*= $p < 0.05$ ; \*\*= $p < 0.01$ ; \*\*\*= $p < 0.001$ ; NS=Not Significant
